# Supplementary material
Source: MDPI journal article supplement (https://www.mdpi.com/2673-3269/5/4/27)
Supplement: s1 [file s1]

## Appendix A

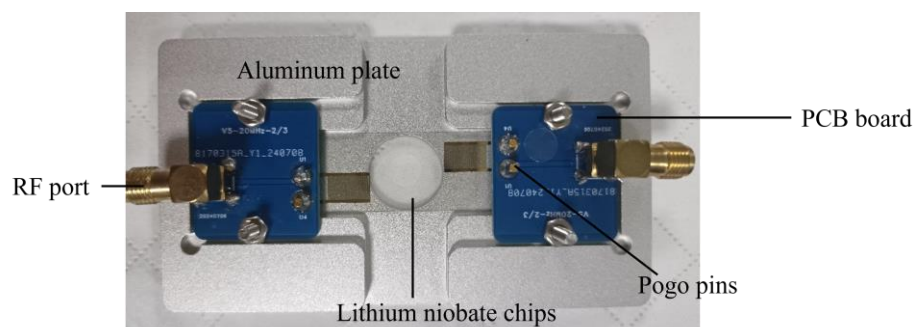

**Figure S1:** Image of the dual Interdigitated Transducer (IDT) setup used in the experiment. The dual IDT are mounted on a piezoelectric substrate, allowing for the generation of surface acoustic waves (SAWs).

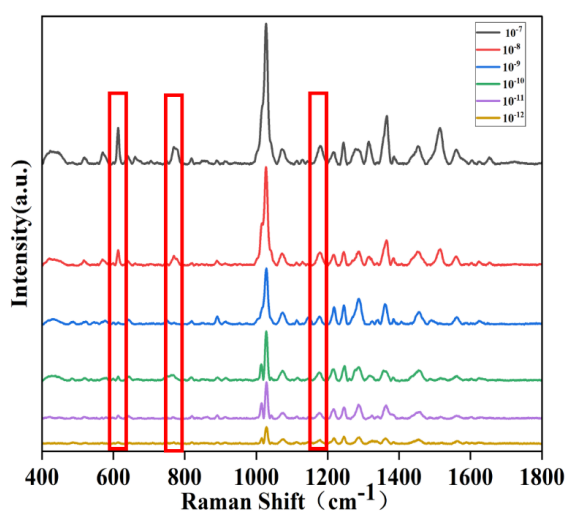

**Figure S2:** Raman spectra of R6G at different concentrations ranging from  $10^{-7}$  M to  $10^{-12}$  M, demonstrating the sensitivity of the surface-enhanced Raman spectroscopy (SERS) set up.

| Parameter                | Value                    | Description                                                                            |
|--------------------------|--------------------------|----------------------------------------------------------------------------------------|
| Mesh Accuracy            | 2                        | Indicates the precision of the mesh;                                                   |
| dt Stability Factor      | 0.99                     | Ensure numerical stability                                                             |
| x max Boundary Condition | PML                      | Perfectly Matched Layer (PML) to absorb outgoing waves and prevent reflections.        |
| PML Type                 | Stretched coordinate PML | Enhances the absorption of waves in the PML region to reduce reflections.              |
| Min Layers               | 8                        | Minimum number of layers in the PML.                                                   |
| Max Layers               | 64                       | Maximum number of layers in the PML.                                                   |
| Particle Size            | 50 nm                    | The diameter of the gold nanoparticles (AuNPs) used in the study is critical for SERS. |

**Figure S3: FDTD simulation setup, showing the geometry with a 50 nm sphere at coordinates ( $x = -55$  nm,  $y = 0$  nm,  $z = 41$  nm), mesh settings with a mesh accuracy of 2 and a minimum mesh step of 0.4 nm, and boundary conditions configured using a Perfectly Matched Layer (PML) with 32 layers optimized to minimize reflections.**

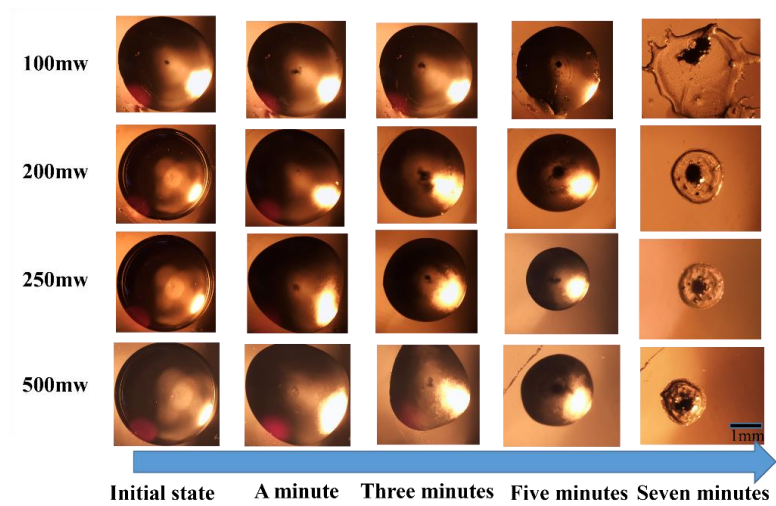

**Figure S4: Optical images showing the enrichment of 50 nm gold nanoparticles within droplets under different input power levels (100 MW, 200 MW, 250 MW, 500 MW).**
